# Supplementary material
Source: Springer Nature journal article supplement (https://www.springermedizin.de/resource/supplementary/12884_2012_570_MOESM1_ESM.pdf/9458054)
Supplement: MOESM1 [file 9458054]

1981 articles

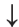

142 articles (abstracts)

Exclusion: quantitative studies, studies about health care professionals' experiences

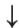

22 articles (read)

Exclusion: not focusing women's experiences, only focusing experiences of CS in relation to VBAC

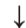

11 articles

Exclusion: Quality check by 45-items based by COREQ 32-item [27] and Walsh and Downe [28].

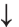

8 articles included in the metasynthesis
